# Supplementary material
Source: PubMed Central journal article supplement (PMC5996397)
Supplement: NIHMS971655-supplement-Supp1.pdf [file NIHMS971655-supplement-Supp1.pdf]

**Analytical and Bioanalytical Chemistry**

**Electronic Supplementary Material**

**Evaluating droplet digital PCR for the quantification of human genomic DNA: converting copies per nanoliter to nanograms nuclear DNA per microliter**

David L. Duewer, Margaret C. Kline, Erica L. Romsos, Blaza Toman

## INDEX

|                                                                                                     |        |
|-----------------------------------------------------------------------------------------------------|--------|
| DATA .....                                                                                          | ESM-3  |
| Table S1 $\lambda/F$ , Dilution-Adjusted Copies per Nanoliter .....                                 | ESM-3  |
| Fig. S1 Relationships Among Experimental Factors .....                                              | ESM-4  |
| OpenBUGS ANALYSIS OF VARIANCE .....                                                                 | ESM-4  |
| Definition of Terms .....                                                                           | ESM-4  |
| OpenBUGS Code .....                                                                                 | ESM-5  |
| Initialization Values .....                                                                         | ESM-6  |
| Data .....                                                                                          | ESM-6  |
| Results .....                                                                                       | ESM-7  |
| Table S2 Component Means, $\lambda/F$ Copies per Nanoliter .....                                    | ESM-7  |
| Table S3 Component Relative Standard Uncertainties, % .....                                         | ESM-7  |
| Table S4 Between-Assay Relative Standard Uncertainties, % .....                                     | ESM-7  |
| Table S5 Relative Between-Assay Differences, % .....                                                | ESM-8  |
| Table S6 Relative Standard Measurement Repeatability, % .....                                       | ESM-8  |
| POISSON SAMPLING UNCERTAINTY AND CHOICE OF COPIES PER DROPLET .....                                 | ESM-9  |
| Fig. S2 Relative Standard Deviations as Functions of $\lambda$ for $N_{\text{tot}} = 17\,000$ ..... | ESM-9  |
| dMIQE CHECKLIST .....                                                                               | ESM-10 |
| Table S7 dMIQE Checklist .....                                                                      | ESM-10 |
| DISCLAIMER .....                                                                                    | ESM-12 |
| REFERENCES .....                                                                                    | ESM-12 |

DATA

Results were obtained for the three human DNA components of a candidate certified reference material (CRM). The components are labeled “A”, “B”, and “C”.

Each component was assessed with ten human nuclear DNA (nDNA) assays, each assay designed to be specific to a unique genetic locus and optimized for droplet digital PCR (ddPCR). The assay indices and codes are: 1) 2PR4, 2) POTP, 3) NEIF, 4) R4Q5, 5) D5, 6) ND6, 7) D9, 8) HBB1, 9) ND14, and 10) 22C3.

Five sets of results were obtained for each component for each of the ten assays. Each set consisted of two technical replicates per assay. Within each set, all results reflect subsamples from the same independently prepared 1:4 dilution of the CRM component. Results were collected from a total of five 96-well plates, each plate providing one set of results for each of the three components plus non-template controls. The plate indices and codes are: 1) d20170711, 2) d20170712a, 3) d20170712b, 4) d20170713, and 5) d20170714.

Table S1 lists the data used in in this study.

**Table S1**  $\lambda/F$ , Dilution-Adjusted Copies per Microliter

| Sample | Assay |      | ddPCR Plate  |       |               |       |               |       |              |       |              |          |
|--------|-------|------|--------------|-------|---------------|-------|---------------|-------|--------------|-------|--------------|----------|
|        |       |      | 1) d20170711 |       | 2) d20170712a |       | 3) d20170712b |       | 4) d20170713 |       | 5) d20170714 |          |
|        | Index | Code | Rep1         | Rep2  | Rep1          | Rep2  | Rep1          | Rep2  | Rep1         | Rep2  | Rep1         | Rep2     |
| A      | 1     | 2PR4 | 12.25        | 12.48 | 12.26         | 12.78 | 12.04         | 12.25 | 13.87        | 14.25 | 11.74        | 11.69    |
|        | 2     | POTP | 12.16        | 12.38 | 11.66         | 12.51 | 12.32         | 12.04 | 13.73        | 13.34 | 11.27        | 10.32    |
|        | 3     | NEIF | 12.11        | 12.23 | 12.33         | 11.86 | 11.87         | 11.93 | 14.36        | 13.98 | 10.74        | 11.26    |
|        | 4     | R4Q5 | 11.72        | 12.19 | 11.97         | 12.95 | 11.46         | 11.66 | 13.07        | 13.75 | 10.97        | 11.16    |
|        | 5     | D5   | 12.16        | 12.37 | 12.77         | 12.12 | 11.82         | 12.14 | 14.14        | 15.61 | 11.30        | 11.65    |
|        | 6     | ND6  | 11.97        | 12.11 | 12.25         | 12.33 | 11.84         | 11.68 | 13.68        | 13.13 | 10.96        | 11.14    |
|        | 7     | D9   | 12.16        | 12.14 | 12.46         | 12.15 | 11.15         | 11.81 | 13.40        | 13.55 | 11.23        | 11.30    |
|        | 8     | HBB1 | 12.08        | 11.84 | 12.91         | 12.86 | 11.44         | 11.63 | 13.30        | 13.22 | 11.38        | 11.62    |
|        | 9     | ND14 | 12.09        | 12.55 | 13.01         | 12.96 | 11.79         | 11.94 | 13.70        | 13.65 | 11.12        | 11.13    |
|        | 10    | 22C3 | 11.35        | 11.78 | 12.95         | 12.92 | 12.31         | 11.88 | 14.18        | 14.27 | 11.48        | <i>a</i> |
| B      | 1     | 2PR4 | 13.73        | 14.40 | 15.98         | 16.40 | 13.30         | 13.27 | 13.11        | 13.38 | 12.63        | 12.99    |
|        | 2     | POTP | 13.59        | 13.09 | 16.18         | 16.85 | 13.70         | 13.23 | 12.75        | 13.32 | 12.88        | 12.48    |
|        | 3     | NEIF | 12.56        | 12.54 | 15.96         | 16.29 | 13.27         | 13.13 | 13.07        | 13.33 | 13.03        | 13.17    |
|        | 4     | R4Q5 | 13.64        | 13.13 | <i>a</i>      | 15.27 | 13.80         | 12.99 | 13.48        | 12.86 | 13.06        | 12.79    |
|        | 5     | D5   | 13.58        | 13.44 | 16.39         | 16.11 | 13.40         | 13.15 | 13.18        | 13.58 | 13.25        | 13.19    |
|        | 6     | ND6  | 13.44        | 13.42 | 15.39         | 14.95 | 12.99         | 12.27 | 12.50        | 12.57 | 12.63        | 12.44    |
|        | 7     | D9   | 13.68        | 13.66 | 14.32         | 15.51 | 13.31         | 12.86 | 13.22        | 13.07 | 13.24        | 12.81    |
|        | 8     | HBB1 | 13.41        | 13.73 | 14.49         | 15.60 | 12.96         | 12.80 | 12.97        | 13.00 | 13.48        | 12.82    |
|        | 9     | ND14 | 13.75        | 13.03 | 15.61         | 15.18 | 13.71         | 13.09 | 12.89        | 12.68 | 12.72        | 12.60    |
|        | 10    | 22C3 | 13.05        | 13.98 | 15.48         | 15.03 | 13.34         | 13.71 | 13.17        | 13.33 | 13.54        | <i>a</i> |
| C      | 1     | 2PR4 | 11.98        | 12.53 | 11.02         | 11.00 | 10.67         | 10.46 | 10.80        | 10.61 | 10.92        | 10.71    |
|        | 2     | POTP | 11.73        | 11.58 | 11.58         | 11.84 | 9.90          | 10.27 | 10.37        | 10.49 | 10.45        | 10.72    |
|        | 3     | NEIF | 11.57        | 11.30 | 11.36         | 11.47 | 10.25         | 9.92  | 11.11        | 10.57 | 10.57        | 10.76    |
|        | 4     | R4Q5 | 11.69        | 11.43 | 11.64         | 11.36 | 10.60         | 10.72 | 10.67        | 10.79 | 10.58        | 10.79    |
|        | 5     | D5   | 11.83        | 11.81 | 11.59         | 11.23 | 10.64         | 11.77 | 11.52        | 11.20 | 11.13        | 10.71    |
|        | 6     | ND6  | 11.68        | 11.38 | 11.75         | 10.86 | 10.75         | 10.55 | 10.88        | 10.46 | 10.35        | 10.38    |
|        | 7     | D9   | 11.53        | 11.55 | 11.66         | 11.05 | 10.30         | 10.53 | 10.60        | 10.72 | 10.80        | 10.84    |
|        | 8     | HBB1 | 11.50        | 12.35 | 11.17         | 11.40 | 10.83         | 10.89 | 10.51        | 10.78 | 10.67        | 10.50    |
|        | 9     | ND14 | 11.49        | 10.97 | 10.87         | 10.57 | 10.77         | 10.89 | 10.38        | 10.37 | 10.77        | 10.48    |
|        | 10    | 22C3 | 11.38        | 12.16 | 11.11         | 10.98 | 10.58         | 11.52 | 10.92        | 10.87 | 10.02        | 10.23    |

*a)* Technical failure

Fig. S1 provides a schematic image of the relationships among the study’s factors.

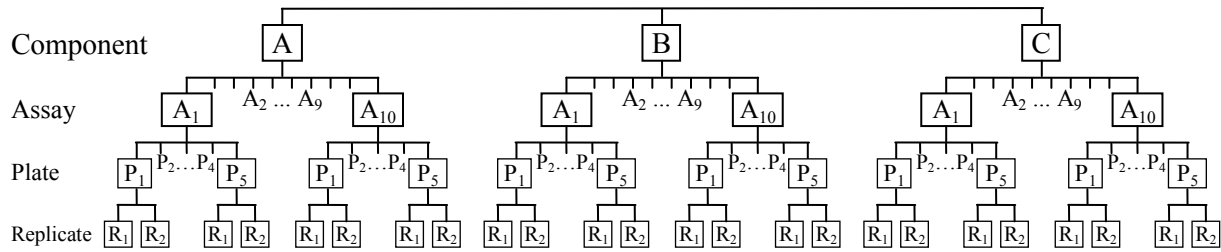

**Fig. S1** Relationships Among Experimental Factors

### OPENBUGS ANALYSIS OF VARIANCE

Using a Markov Chain Monte Carlo Bayesian approach [1,2] to analysis of variance, we model the measurement results as

$$\begin{aligned}
 y_{ijk} &\sim N(\gamma_{ijk}, \sigma_{ij}^2), \\
 \gamma_{ijk} &\sim N(\alpha_{ij}, \sigma_{plateij}^2), \\
 \alpha_{ij} &\sim N(\mu_i, \sigma_{componenti}^2).
 \end{aligned}$$

where “ $\sim$ ” signifies “distributed as”,  $N(\mu, \sigma^2)$  represents a Gaussian distribution with mean  $\mu$  and variance  $\sigma^2$ ,  $i$  indexes the CRM components,  $j$  the assays, and  $k$  the plates. The variance components are  $\sigma_{componenti}^2$  which measures the between-assay variability for component  $i$ ,  $\sigma_{plateij}^2$  which measures the between-plate variability for each component and assay combination, and  $\sigma_{ij}^2$  which measures the repeatability variability.

The data was analyzed using Bayesian MCMC with non-informative Gaussian priors for the means and either Gamma priors for the variance components or Uniform priors for standard deviations when Gamma variance priors would not converge.

OpenBUGS is a freely available open-source software package for performing Bayesian inference Using Gibbs Sampling [3]. The user defines a statistical model that states the relationships between related variables and controls the evaluation of the data using the model. Please see <http://www.openbugs.net/w/FrontPage> on how to obtain 1) the package and 2) the User’s Manual.

The following provides the complete code, initialization values, and data required to estimate the values of interest.

#### Definition of Terms

```

# Outputs
# c0[3]..... Between-plate %CV for each component
# c1a[3,5]..... Between assay %CV for each component-plate combination
# c1aA[3]..... Mean within-component between-assay %CV
# c1aGA..... Global mean between-assay %CV
# c1b[3,5]..... Repeatability %CV for each component-plate combination
# c1bA[3]..... Mean within-component repeatability %CV
# c1bGA..... Grand mean repeatability %CV
#
# d1[3,10] ..... % difference from mean for each component-assay combination
# d1A[3]..... Mean % difference from mean for each component
# d1GA ..... Grand mean % difference
#
# m0[3] ..... Grand mean for each component
# m1[3,5] ..... Mean for each plate for each component

```

```

# m1P[3,10] .... Prediction mean for each assay for each component
# m2[3,5,10] ... Mean for each assay for each plate for each component
#
# Indices
# i ..... components (A, B, C)
# j ..... assays (2PR4, POTP, NEIF, R4Q5, D5, ND6, D9, HBB1, ND14, 22C3)
# k ..... plates (dd20170711a, dd20170711b, dd20170712, dd20170713, dd20170714)
# l ..... Technical replicates (Rep1, Rep2)
#
# Intermediate variance-related variables initialized as uniform distributions
# s1a[3,5] ..... Between assay standard deviation for each component-plate combination
# s1P[3,10] ..... Prediction between plate standard deviation for each component-assay combination
# v1a[3,5] ..... Between assay inverse-variance for each component-plate combination
# v1P[3,10] ..... Prediction between plate inverse-variance for each component-assay combination
#
# Intermediate variance-related variables requiring initialization
# v0[3] ..... Between-plate inverse-variance for each component
# v1b[3,5] ..... Repeatability inverse-variance for each component-plate combination
#
# Data
# lamb1[3,10,5,2]... dilution-adjusted copies per droplet arranged by component/plate/assay/technical replicate
# lamb2[3,10,5,2]... same as lamb1; required for predicting the differences (BUGS doesn't allow data re-use)

```

### OpenBUGS Code

```

Anova_Begin{
#
# Define distributions
for(i in 1:3){m0[i]~dnorm(0,1.0E-5);v0[i]~dgamma(1.0E-5,1.0E-5);c0[i]<-100/(m0[i]*sqrt(v0[i]))}
for(i in 1:3){for(k in 1:5){m1[i,k]~dnorm(m0[i],v0[i])
s1a[i,k]~dunif(0,3);v1a[i,k]<-1/pow(s1a[i,k],2);c1a[i,k]<-100/(m0[i]*sqrt(v1a[i,k]));
v1b[i,k]~dgamma(1.0E-5,1.0E-5);c1b[i,k]<-100/(m0[i]*sqrt(v1b[i,k]))}}
for(i in 1:3){for(j in 1:10){for(k in 1:5){m2[i,j,k]~dnorm(m1[i,k],v1a[i,k])}}}
#
# Define average %CV
c0A<-mean(c0[,]);c1aGA<-mean(c1a[,,]);c1bGA<-mean(c1b[,,])
for(i in 1:3){c1aA[i]<-mean(c1a[i,]);c1bA[i]<-mean(c1b[i,])}
#
# Parameterize distributions
for(i in 1:3){for(j in 1:10){for(k in 1:5){for(l in 1:2){lamb1[i,j,k,l]~dnorm(m2[i,j,k],v1b[i,k])}}}}
#####
# Prediction phase
#####
# Define the between-assay differences
for(i in 1:3){for(j in 1:10){m1P[i,j]~dnorm(0,1.0E-5);s1P[i,j]~dunif(0,5);v1P[i,j]<-1/pow(s1P[i,j],2)}}
for(i in 1:3){for(j in 1:10){d1[i,j]<-100*(m1P[i,j]/m0[i]-1)}}
#
# Define average difference
d1GA<-mean(d1[,,]);for(j in 1:10){d1A[j]<-mean(d1[,j])}
#
# Parameterize prediction-phase distributions
for(i in 1:3){for(j in 1:10){for(k in 1:5){for(l in 1:2){lamb2[i,j,k,l]~dnorm(m1P[i,j],v1P[i,j])}}}}
}End_Anova

```

### Initialization Values

```
list(v0=c(1,1,1),  
v1b=structure(.Data=c(1,1,1,1,1,1,1,1,1,1,1,1,1,1,1,1),.Dim=c(3,5)))
```

### Data

```
list(lamb1=structure(.Data=c(  
12.25,12.48,12.26,12.78,12.04,12.25,13.87,14.25,11.74,11.69,  
12.16,12.38,11.66,12.51,12.32,12.04,13.73,13.34,11.27,10.32,  
12.11,12.23,12.33,11.86,11.88,11.93,14.36,13.98,10.75,11.26,  
11.72,12.19,11.97,12.95,11.46,11.66,13.07,13.75,10.97,11.16,  
12.16,12.37,12.77,12.12,11.82,12.14,14.14,15.61,11.30,11.66,  
11.97,12.11,12.25,12.33,11.84,11.68,13.68,13.13,10.96,11.14,  
12.16,12.14,12.46,12.15,11.15,11.81,13.40,13.55,11.23,11.30,  
12.08,11.84,12.91,12.86,11.44,11.63,13.30,13.22,11.38,11.62,  
12.09,12.55,13.01,12.97,11.79,11.94,13.70,13.65,11.12,11.13,  
11.35,11.78,12.95,12.92,12.31,11.88,14.18,14.27,11.48, NA ,  
13.73,14.40,15.98,16.40,13.30,13.27,13.11,13.38,12.63,12.99,  
13.59,13.09,16.18,16.85,13.70,13.23,12.75,13.32,12.88,12.48,  
12.56,12.54,15.96,16.29,13.27,13.13,13.07,13.33,13.03,13.17,  
13.64,13.13, NA ,15.27,13.80,12.99,13.48,12.86,13.06,12.79,  
13.58,13.44,16.39,16.11,13.40,13.15,13.18,13.58,13.25,13.19,  
13.44,13.42,15.39,14.95,12.99,12.28,12.50,12.57,12.63,12.44,  
13.68,13.66,14.32,15.51,13.31,12.86,13.22,13.07,13.24,12.81,  
13.41,13.73,14.49,15.60,12.96,12.80,12.97,13.00,13.48,12.82,  
13.75,13.03,15.61,15.18,13.71,13.09,12.89,12.68,12.72,12.60,  
13.05,13.98,15.48,15.03,13.34,13.72,13.17,13.33,13.54, NA ,  
11.98,12.53,11.02,11.00,10.67,10.46,10.80,10.61,10.92,10.71,  
11.73,11.58,11.58,11.84,09.90,10.27,10.37,10.49,10.45,10.72,  
11.57,11.30,11.36,11.47,10.25,09.92,11.11,10.57,10.57,10.76,  
11.69,11.43,11.64,11.36,10.60,10.72,10.67,10.79,10.58,10.79,  
11.84,11.81,11.59,11.23,10.64,11.77,11.52,11.20,11.13,10.71,  
11.68,11.38,11.75,10.86,10.75,10.55,10.88,10.47,10.35,10.38,  
11.53,11.55,11.66,11.05,10.30,10.53,10.60,10.72,10.80,10.84,  
11.50,12.35,11.17,11.40,10.83,10.89,10.51,10.78,10.68,10.50,  
11.49,10.97,10.87,10.57,10.77,10.89,10.38,10.37,10.77,10.48,  
11.38,12.16,11.11,10.98,10.58,11.52,10.92,10.87,10.02,10.23),.Dim=c(3,10,5,2)),  
lamb2=structure(.Data=c(  
12.25,12.48,12.26,12.78,12.04,12.25,13.87,14.25,11.74,11.69,  
12.16,12.38,11.66,12.51,12.32,12.04,13.73,13.34,11.27,10.32,  
12.11,12.23,12.33,11.86,11.88,11.93,14.36,13.98,10.75,11.26,  
11.72,12.19,11.97,12.95,11.46,11.66,13.07,13.75,10.97,11.16,  
12.16,12.37,12.77,12.12,11.82,12.14,14.14,15.61,11.30,11.66,  
11.97,12.11,12.25,12.33,11.84,11.68,13.68,13.13,10.96,11.14,  
12.16,12.14,12.46,12.15,11.15,11.81,13.40,13.55,11.23,11.30,  
12.08,11.84,12.91,12.86,11.44,11.63,13.30,13.22,11.38,11.62,  
12.09,12.55,13.01,12.97,11.79,11.94,13.70,13.65,11.12,11.13,  
11.35,11.78,12.95,12.92,12.31,11.88,14.18,14.27,11.48, NA ,  
13.73,14.40,15.98,16.40,13.30,13.27,13.11,13.38,12.63,12.99,  
13.59,13.09,16.18,16.85,13.70,13.23,12.75,13.32,12.88,12.48,  
12.56,12.54,15.96,16.29,13.27,13.13,13.07,13.33,13.03,13.17,  
13.64,13.13, NA ,15.27,13.80,12.99,13.48,12.86,13.06,12.79,  
13.58,13.44,16.39,16.11,13.40,13.15,13.18,13.58,13.25,13.19,  
13.44,13.42,15.39,14.95,12.99,12.28,12.50,12.57,12.63,12.44,  
13.68,13.66,14.32,15.51,13.31,12.86,13.22,13.07,13.24,12.81,  
13.41,13.73,14.49,15.60,12.96,12.80,12.97,13.00,13.48,12.82,
```

13.75,13.03,15.61,15.18,13.71,13.09,12.89,12.68,12.72,12.60,  
 13.05,13.98,15.48,15.03,13.34,13.72,13.17,13.33,13.54, NA ,  
 11.98,12.53,11.02,11.00,10.67,10.46,10.80,10.61,10.92,10.71,  
 11.73,11.58,11.58,11.84,09.90,10.27,10.37,10.49,10.45,10.72,  
 11.57,11.30,11.36,11.47,10.25,09.92,11.11,10.57,10.57,10.76,  
 11.69,11.43,11.64,11.36,10.60,10.72,10.67,10.79,10.58,10.79,  
 11.84,11.81,11.59,11.23,10.64,11.77,11.52,11.20,11.13,10.71,  
 11.68,11.38,11.75,10.86,10.75,10.55,10.88,10.47,10.35,10.38,  
 11.53,11.55,11.66,11.05,10.30,10.53,10.60,10.72,10.80,10.84,  
 11.50,12.35,11.17,11.40,10.83,10.89,10.51,10.78,10.68,10.50,  
 11.49,10.97,10.87,10.57,10.77,10.89,10.38,10.37,10.77,10.48,  
 11.38,12.16,11.11,10.98,10.58,11.52,10.92,10.87,10.02,10.23),.Dim=c(3,10,5,2))))

## Results

The results in Tables S2 through S6 were obtained using OpenBUGS Version 3.2.3 rev 1012. Initial burn-in used 10 000 samplings with 10-fold thinning. The posterior distributions were defined with 100 000 samplings with 2-fold thinning. For each parameter, the listed statistics summarize the resulting posterior distributions.

Mean..... arithmetic mean  
 SD..... standard deviation  
 2.5 %..... 0.025 percentile  
 25 %..... 0.25 percentile (1st quartile)  
 median ..... 0.50 percentile (2nd quartile)  
 75 %..... 0.75 percentile (3rd quartile)  
 97.5 %..... 0.975 percentile  
 Asym ..... right-hand/left-hand asymmetry, (97.5 % - 50 %)/(50 % - 2.5 %)

Note: when “Asym” is about 1, the mean and median results will be similar and the SD will provide a useful estimate of the standard deviation of that mean value. As the asymmetry increasingly deviates from 1, the mean and SD estimates become increasingly biased. For this reason, we base our estimated values on the median results. The results of interest to this study are in red font.

**Table S2** Component Means,  $\lambda/F$  Copies per Nanoliter

| Parameter | Mean  | SD   | 2.5 % | 25 %  | median | 75 %  | 97.5 % | Asym |
|-----------|-------|------|-------|-------|--------|-------|--------|------|
| m0[1]     | 12.29 | 0.59 | 11.14 | 11.98 | 12.29  | 12.60 | 13.46  | 1.02 |
| m0[2]     | 13.64 | 0.69 | 12.31 | 13.28 | 13.64  | 14.00 | 15.00  | 1.02 |
| m0[3]     | 10.99 | 0.29 | 10.41 | 10.83 | 10.99  | 11.14 | 11.56  | 0.98 |

**Table S3** Component Relative Standard Uncertainties, %

| Parameter | Mean | SD    | 2.5 % | 25 % | median | 75 %  | 97.5 % | Asym |
|-----------|------|-------|-------|------|--------|-------|--------|------|
| c0[1]     | 9.59 | 5.43  | 4.42  | 6.49 | 8.29   | 11.03 | 22.6   | 3.70 |
| c0[2]     | 9.86 | 10.42 | 4.38  | 6.67 | 8.54   | 11.39 | 23.06  | 3.49 |
| c0[3]     | 5.14 | 2.93  | 2.29  | 3.46 | 4.46   | 5.96  | 12.06  | 3.49 |
| c0A       | 8.2  | 4.04  | 4.88  | 6.46 | 7.64   | 9.25  | 14.70  | 2.55 |

**Table S4** Between-Assay Relative Standard Uncertainties, %

| Parameter | Mean | SD   | 2.5 % | 25 % | median | 75 % | 97.5 % | Asym |
|-----------|------|------|-------|------|--------|------|--------|------|
| claA[1]   | 2.20 | 0.57 | 1.21  | 1.81 | 2.16   | 2.54 | 3.42   | 1.33 |
| claA[2]   | 2.19 | 0.63 | 1.18  | 1.78 | 2.14   | 2.53 | 3.51   | 1.44 |
| claA[3]   | 2.19 | 0.53 | 1.25  | 1.82 | 2.16   | 2.52 | 3.33   | 1.30 |
| claGA     | 2.19 | 0.33 | 1.60  | 1.97 | 2.17   | 2.39 | 2.89   | 1.25 |

**Table S5** Relative Between-Assay Differences, %

| Parameter | Mean  | SD   | 2.5 %  | 25 %  | median | 75 %  | 97.5 % | Asym |
|-----------|-------|------|--------|-------|--------|-------|--------|------|
| d1[1,1]   | 2.43  | 5.98 | -8.07  | -1.01 | 2.19   | 5.49  | 14.17  | 1.17 |
| d1[1,2]   | -0.70 | 5.97 | -11.34 | -4.20 | -0.94  | 2.43  | 11.17  | 1.16 |
| d1[1,3]   | 0.05  | 6.27 | -11.10 | -3.64 | -0.17  | 3.40  | 12.51  | 1.16 |
| d1[1,4]   | -1.41 | 5.83 | -11.68 | -4.79 | -1.64  | 1.62  | 10.21  | 1.18 |
| d1[1,5]   | 2.82  | 6.70 | -9.21  | -1.18 | 2.55   | 6.48  | 16.24  | 1.16 |
| d1[1,6]   | -1.24 | 5.75 | -11.28 | -4.55 | -1.47  | 1.71  | 10.12  | 1.18 |
| d1[1,7]   | -1.04 | 5.76 | -11.11 | -4.37 | -1.27  | 1.94  | 10.34  | 1.18 |
| d1[1,8]   | -0.27 | 5.69 | -10.24 | -3.53 | -0.49  | 2.64  | 10.98  | 1.18 |
| d1[1,9]   | 1.10  | 6.02 | -9.52  | -2.37 | 0.86   | 4.23  | 13.03  | 1.17 |
| d1[1,10]  | 2.48  | 6.49 | -9.18  | -1.40 | 2.25   | 5.98  | 15.57  | 1.17 |
|           |       |      |        |       |        |       |        |      |
| d1[2,1]   | 2.30  | 6.48 | -9.34  | -1.61 | 2.03   | 5.79  | 15.42  | 1.18 |
| d1[2,2]   | 1.45  | 6.81 | -10.89 | -2.64 | 1.19   | 5.21  | 15.16  | 1.16 |
| d1[2,3]   | 0.22  | 6.52 | -11.64 | -3.67 | -0.01  | 3.79  | 13.40  | 1.15 |
| d1[2,4]   | -1.18 | 5.73 | -11.32 | -4.45 | -1.42  | 1.74  | 10.32  | 1.19 |
| d1[2,5]   | 2.36  | 6.45 | -9.19  | -1.47 | 2.09   | 5.83  | 15.35  | 1.18 |
| d1[2,6]   | -2.54 | 6.00 | -13.22 | -6.08 | -2.79  | 0.64  | 9.58   | 1.19 |
| d1[2,7]   | -0.27 | 5.73 | -10.51 | -3.55 | -0.50  | 2.67  | 11.25  | 1.17 |
| d1[2,8]   | -0.60 | 5.83 | -10.94 | -3.97 | -0.83  | 2.40  | 11.06  | 1.18 |
| d1[2,9]   | -0.59 | 6.06 | -11.46 | -4.16 | -0.82  | 2.59  | 11.63  | 1.17 |
| d1[2,10]  | 1.78  | 5.99 | -8.84  | -1.68 | 1.53   | 4.87  | 13.78  | 1.18 |
|           |       |      |        |       |        |       |        |      |
| d1[3,1]   | 0.81  | 3.57 | -6.00  | -1.37 | 0.75   | 2.90  | 7.96   | 1.07 |
| d1[3,2]   | -0.79 | 3.67 | -7.84  | -3.05 | -0.85  | 1.36  | 6.54   | 1.06 |
| d1[3,3]   | -0.83 | 3.33 | -7.13  | -2.82 | -0.89  | 1.08  | 5.86   | 1.08 |
| d1[3,4]   | 0.42  | 3.14 | -5.51  | -1.43 | 0.35   | 2.18  | 6.66   | 1.08 |
| d1[3,5]   | 3.31  | 3.20 | -2.73  | 1.45  | 3.23   | 5.08  | 9.68   | 1.08 |
| d1[3,6]   | -0.69 | 3.25 | -6.87  | -2.63 | -0.75  | 1.15  | 5.74   | 1.06 |
| d1[3,7]   | -0.20 | 3.18 | -6.24  | -2.08 | -0.27  | 1.57  | 6.09   | 1.06 |
| d1[3,8]   | 0.74  | 3.38 | -5.66  | -1.30 | 0.67   | 2.68  | 7.44   | 1.07 |
| d1[3,9]   | -2.05 | 2.91 | -7.50  | -3.71 | -2.12  | -0.48 | 3.69   | 1.08 |
| d1[3,10]  | -0.02 | 3.50 | -6.68  | -2.14 | -0.08  | 2.01  | 6.89   | 1.06 |
|           |       |      |        |       |        |       |        |      |
| d1GA      | 0.28  | 3.44 | -4.50  | -1.33 | 0.16   | 1.71  | 5.61   | 1.17 |

**Table S6** Relative Standard Measurement Repeatability, %

| Parameter | Mean | SD   | 2.5 % | 25 % | median | 75 % | 97.5 % | Asym |
|-----------|------|------|-------|------|--------|------|--------|------|
| c1bA[1]   | 2.65 | 0.31 | 2.11  | 2.43 | 2.63   | 2.84 | 3.32   | 1.36 |
| c1bA[2]   | 2.63 | 0.37 | 2.08  | 2.41 | 2.60   | 2.82 | 3.32   | 1.39 |
| c1bA[3]   | 2.62 | 0.28 | 2.13  | 2.42 | 2.60   | 2.80 | 3.22   | 1.32 |
| c1bGA     | 2.63 | 0.19 | 2.32  | 2.51 | 2.62   | 2.74 | 3.00   | 1.21 |



## POISSON SAMPLING UNCERTAINTY AND CHOICE OF COPIES PER DROPLET

The relative standard uncertainty associated with Poisson processes involved in ddPCR is a function of both the mean number of copies per droplet,  $\lambda$ , and the number of droplets counted,  $N_{\text{tot}}$  [4]:

$$CV_{\text{Poisson}} = f(\lambda, N_{\text{tot}}) = 100 \sqrt{\frac{1 - e^{-\lambda}}{N_{\text{tot}} \lambda^2 e^{-\lambda}}} \%.$$

For  $\lambda = 0.3$  copies per droplet and  $N_{\text{tot}} = 17\,000$  droplets, the relative standard deviation due to Poisson sampling is

$$CV_{\text{Poisson}} = 100 \sqrt{\frac{1 - e^{-0.3}}{(17\,000)(0.3^2)(e^{-0.3})}} = 1.51 \%.$$

From Table S6, we estimate the measurement repeatability for the processes used in this study as 2.62 %.

The “extra” variability of the processes can be estimated from the difference between the variances associated with the mean relative repeatability,  $CV_{\text{observed}}$  (the “c1bGA” term in the OpenBUGS code and Table S6) and  $CV_{\text{Poisson}}$ :

$$CV_{\text{extra}} = \sqrt{CV_{\text{observed}}^2 - CV_{\text{Poisson}}^2} = \sqrt{2.62^2 - 1.51^2} \cong 2.14 \%.$$

Assuming that the source(s) of  $CV_{\text{extra}}$  are independent of the DNA content in the sample, the expected relative standard uncertainty for the total measurement process becomes:

$$CV_{\text{expected}} = f(\lambda, N_{\text{tot}}, CV_{\text{extra}}) = 100 \sqrt{\frac{1 - e^{-\lambda}}{N_{\text{tot}} \lambda^2 e^{-\lambda}} + \left(\frac{CV_{\text{extra}}}{100}\right)^2} \%.$$

Fig. S2 displays  $CV_{\text{Poisson}}$  and  $CV_{\text{expected}}$  as functions of  $\lambda$  for  $N_{\text{tot}} = 17\,000$ .

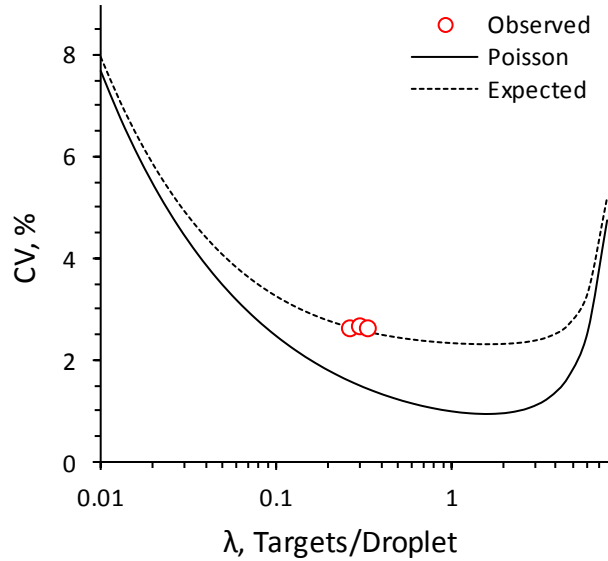

**Fig. S2** Relative Standard Deviations as Functions of  $\lambda$  for  $N_{\text{tot}} = 17\,000$

One implication of a non-zero  $CV_{\text{extra}}$  is the effective “flattening” of the  $CV_{\text{Poisson}}$  curve. While the minimum value for both  $CV_{\text{Poisson}}$  and the  $CV_{\text{expected}}$  remains the same  $\approx 1.6$  copies per droplet, the interval of “almost minimum” variability is much wider for  $CV_{\text{expected}}$ . In our experience, ddPCR results for targets on minimally fragmented human nDNA can become biased-low for  $\lambda > \approx 0.8$  (data not shown). We therefore chose to make our certification studies with  $\lambda \approx 0.3$  copies per droplet, accepting some increase in variability to minimize the potential for bias.

## dMIQE CHECKLIST

Table S7 follows the “Minimum Information for Publication of Quantitative Digital PCR Experiments” guidelines [5]. Note that much of the requested information is intended for studies focused on biological issues and is “Not Applicable” to studies characterizing dPCR platform performance.

**Table S7** dMIQE Checklist

| <b>EXPERIMENTAL DESIGN</b>                                            | <b>Comments</b>                                                                                                                     |
|-----------------------------------------------------------------------|-------------------------------------------------------------------------------------------------------------------------------------|
| Definition of experimental and control groups                         | Studies on the metrological traceability of dPCR platforms using human nuclear DNA (nDNA)                                           |
| Number within each group                                              | Variable                                                                                                                            |
| Assay carried out by core lab or investigator's lab?                  | Investigator's lab                                                                                                                  |
| <b>SAMPLE</b>                                                         | <b>Comments</b>                                                                                                                     |
| Description                                                           | nDNA extracted from Buffy coat cells using a modified salt-out method [6]                                                           |
| Volume or mass of sample processed                                    | Multiple 5 mL aliquots                                                                                                              |
| Microdissection or macrodissection                                    | Not applicable                                                                                                                      |
| Processing procedure                                                  | Not applicable                                                                                                                      |
| If frozen - how and how quickly?                                      | Not applicable                                                                                                                      |
| If fixed - with what, how quickly?                                    | Not applicable                                                                                                                      |
| Sample storage conditions and duration                                | Samples stored at 4 °C.                                                                                                             |
| <b>NUCLEIC ACID EXTRACTION</b>                                        | <b>Comments</b>                                                                                                                     |
| Quantification - instrument/method                                    | denatured to ssDNA, spectrophotometry (Cary 100 Bio)                                                                                |
| Storage conditions: temperature, concentration, duration, buffer      | 4 °C in TE <sup>-4</sup> pH 8.0 buffer (10 mmol/L tris(hydroxymethyl)aminomethane HCl, 0.1 mmol/L ethylenediaminetetraacetic acid). |
| DNA or RNA quantification                                             | DNA                                                                                                                                 |
| Template structural information                                       | Very large fragment (> 48 502 bp) dsDNA, gel electrophoresis and UV absorption spectroscopy                                         |
| Template modification (digestion, sonication, pre-amplification etc.) | none                                                                                                                                |
| Template treatment (initial heating or chemical denaturation)         | none                                                                                                                                |
| Inhibition dilution or spike;                                         | Not applicable                                                                                                                      |
| DNA contamination assessment of RNA sample                            | Not applicable                                                                                                                      |
| Details of DNase treatment where performed                            | Not applicable                                                                                                                      |
| Manufacturer of reagents used and catalogue number                    |                                                                                                                                     |
| Storage of nucleic acid: temperature, concentration, duration, buffer | nDNA: < 1 year at 4 °C                                                                                                              |
| <b>dPCR TARGET INFORMATION</b>                                        | <b>Comments</b>                                                                                                                     |
| Sequence accession number                                             | See Table 1                                                                                                                         |
| Location of amplicon                                                  | See Table 1                                                                                                                         |
| Amplicon length                                                       | See Table 1                                                                                                                         |
| In silico specificity screen (BLAST, etc.)                            | BLAST                                                                                                                               |
| Location of each primer by exon or intron                             | Not applicable                                                                                                                      |
| <b>dPCR OLIGONUCLEOTIDES</b>                                          | <b>Comments</b>                                                                                                                     |
| Primer sequences and/or amplicon context sequence                     | See Table 1                                                                                                                         |
| Probe sequences                                                       | See Table 1                                                                                                                         |
| Location and identity of any modifications                            | Not applicable                                                                                                                      |
| Manufacturer of oligonucleotides                                      | Eurofins MWG Operon (Huntsville, AL)                                                                                                |
| Purification method                                                   | salt-free purification.                                                                                                             |

**Table S7** (Continued). dMIQE Checklist

| <b>dPCR PROTOCOL</b>                                                           | <b>Comments</b>                                                                        |
|--------------------------------------------------------------------------------|----------------------------------------------------------------------------------------|
| Complete reaction conditions                                                   | See text                                                                               |
| Reaction volume and amount of RNA/cDNA/DNA                                     | See text                                                                               |
| Primer, (probe), Mg <sup>++</sup> and dNTP concentrations                      | See text                                                                               |
| Polymerase identity and concentration                                          | See text                                                                               |
| Buffer/kit Catalogue No and manufacturer                                       | See text                                                                               |
| Exact chemical constitution of the buffer                                      | Proprietary                                                                            |
| Additives (SYBR Green I, DMSO, etc.)                                           | Not applicable                                                                         |
| Plates/tubes Catalogue No and manufacturer                                     | Various                                                                                |
| Complete thermocycling parameters                                              | See text                                                                               |
| Reaction setup                                                                 | See text                                                                               |
| Gravimetric or volumetric dilutions (manual/robotic)                           | Gravimetric and manual volumetric                                                      |
| Total PCR reaction volume prepared                                             | See text                                                                               |
| Partition number                                                               | 10 000 to 20 000                                                                       |
| Individual partition volume                                                    | ddPCR: 0.7349 nL ± 1.2 %, see [7]                                                      |
| Total volume of the partitions measured                                        | Variable                                                                               |
| Partition volume variance/standard deviation                                   | See [4]                                                                                |
| Comprehensive details and appropriate use of controls                          | See text                                                                               |
| Manufacturer of dPCR instrument                                                | ddPCR: Bio-Rad                                                                         |
| <b>dPCR VALIDATION</b>                                                         | <b>Comments</b>                                                                        |
| Optimisation data for the assay                                                | See [8,9]                                                                              |
| Specificity (when measuring rare mutations, pathogen sequences etc.)           | Not applicable                                                                         |
| Limit of detection of calibration control                                      | Not applicable                                                                         |
| If multiplexing, comparison with singleplex assays                             | Not applicable                                                                         |
| <b>DATA ANALYSIS</b>                                                           | <b>Comments</b>                                                                        |
| Average copies per partition                                                   | $\lambda = 0.3$                                                                        |
| dPCR analysis program (source, version)                                        | Bio-Rad QuantaSoft, Ver 1.7.4.0917<br>In-house spreadsheet systems                     |
| Outlier identification and disposition                                         | three technical failures (of 400 measurements) identified by manufacture's diagnostics |
| Results of NTCs                                                                | Zero to few                                                                            |
| Examples of positive(s) and negative experimental results as supplemental data | Not applicable                                                                         |
| Where appropriate, justification of number and choice of reference genes       | See text                                                                               |
| Where appropriate, description of normalisation method                         | Not applicable                                                                         |
| Number and concordance of biological replicates                                | Not applicable                                                                         |
| Number and stage (RT or qPCR) of technical replicates                          | Not applicable                                                                         |
| Repeatability (intra-assay variation)                                          | See Table S4                                                                           |
| Reproducibility (inter-assay variation)                                        | See Table S3                                                                           |
| Experimental variance or confidence interval                                   | Variable                                                                               |
| Statistical methods used for analysis                                          | Not applicable                                                                         |
| Data submission using RDML                                                     | Not applicable                                                                         |

## DISCLAIMER

Certain commercial equipment, instruments, or materials are identified in this report to specify adequately experimental conditions or reported results. Such identification does not imply recommendation or endorsement by the National Institute of Standards and Technology, nor does it imply that the equipment, instruments, or materials identified are necessarily the best available for the purpose.

## REFERENCES

- 1 Gill J. Bayesian Methods: A Social and Behavioral Sciences Approach, 2<sup>nd</sup> Ed. Chapman & Hall/CRC, Boca Raton, FL USA. 2002. Chapter 9: A Primer on Markov Chain Monte Carlo. Free on-line at: <http://www4.stat.ncsu.edu/~sghosh/TEACHING/st790/lectures/GillMCMC.pdf>
- 2 Gelman A, Carlin JB, Stern HA, Rubin DB. Bayesian Data Analysis, 2nd Ed. Chapman and Hall/CRC, Boca Raton, FL USA. 2004.
- 3 Lunn DJ, Spiegelhalter D, Thomas A, Best N. The BUGS project: Evolution, critique and future directions (with discussion), *Statistics in Medicine* 2009;28:3049–3082. See also <http://www.mrc-bsu.cam.ac.uk/bugs/> and <http://www.openbugs.info/w/>
- 4 Whale AS, Huggett JF, Cowen S, Speirs V, Shaw J, Ellison S, Foy CA, Scott DJ. Comparison of microfluidic digital PCR and conventional quantitative PCR for measuring copy number variation. *Nucleic Acids Res.* 2012;40(11):e82. <https://doi.org/10.1093/nar/gks203>
- 5 Huggett, J.F.; Foy, C.A.; Benes, V.; et al. The Digital MIQE Guidelines: Minimum Information for Publication of Quantitative Digital PCR Experiments. *Clin Chem.* 2013, 59(6), 892-902. <https://doi.org/10.1373/clinchem.2013.206375>
- 6 Miller SA, Dykes DD, Polesky HF. A simple salting out procedure for extracting DNA from human nucleated cells. *Nucleic Acids Res* 1988;16(3):1215. <https://doi.org/10.1093/nar/16.3.1215>
- 7 Dagata, J.A.; Farkas, N.; Kramer, J.A. Method for Measuring the Volume of Nominally 100  $\mu\text{m}$  Diameter Spherical Water-in-Oil Emulsion Droplets, NIST Special Publication 260-184, 2016. <https://doi.org/10.6028/NIST.SP.260-184>
- 8 Kline MC, Romsos EL, Duewer DL. Evaluating Digital PCR for the Quantification of Human Genomic DNA: Accessible Amplifiable Targets. *Anal Chem* 2016;88(4):2132-2139. <https://doi.org/10.1021/acs.analchem.5b03692>
- 9 Kline MC, Duewer DL. Evaluating Droplet Digital Polymerase Chain Reaction for the Quantification of Human Genomic DNA: Lifting the Traceability Fog. *Anal Chem* 2017;89(8):4648 4654. <https://doi.org/10.1021/acs.analchem.7b00240>
